1 **Title:** Early low-level developmental arsenic exposure impacts mouse hippocampal synaptic  
2 function

3

4 **Running Title:** Early arsenic exposure alters synaptic function

5

6 **Authors:** Karl F.W. **Foley**<sup>1</sup>, Daniel **Barnett**<sup>2</sup>, Deborah A. **Cory-Slechta**<sup>3</sup>, & Houhui **Xia**<sup>1,2</sup>

7

8 **Affiliations:** University of Rochester Medical Center, Departments of Neuroscience<sup>1</sup>,  
9 Pharmacology & Physiology<sup>2</sup>, and Environmental Medicine<sup>3</sup>, Rochester, New York

10

11 **Corresponding Author:** Houhui Xia, [houhui\\_xia@urmc.rochester.edu](mailto:houhui_xia@urmc.rochester.edu)

12

13 **Funding Sources:** P30 ES001247 (UR EHSC Pilot Grant, Lawrence Xia 021918); NIMH  
14 (F30MH122046) to KFWF; NSF (IOS 1457336) and NIH (R01MH109719) to HX.

15

16 **Conflicts of Interest:** none declared

17 **Abstract:**

18 Background: Arsenic is a well-established carcinogen known to increase all-cause mortality, but  
19 its effects on the central nervous system are less well understood. Recent epidemiological studies  
20 suggest that early life exposure to arsenic is associated with learning deficits and behavioral  
21 changes, and increased arsenic exposure continues to affect an estimated 200 million individuals  
22 worldwide. Previous studies on arsenic exposure and synaptic function have demonstrated a  
23 decrease in synaptic transmission and long-term potentiation in adult rodents, but have relied on  
24 *in vitro* or extended exposure in adulthood. Therefore, little is known about the effect of arsenic  
25 exposure in development.

26 Objective: Here, we studied the effects of gestational and early developmental arsenic exposure  
27 in juvenile mice. Specifically, our objective was to investigate the impact of arsenic exposure on  
28 synaptic transmission and plasticity in the hippocampus.

29 Methods: C57BL/6 females were exposed to arsenic (0, 50ppb, 36ppm) in their drinking water  
30 two weeks prior to mating and continued to be exposed to arsenic throughout gestation and after  
31 parturition. We then performed field recordings in acute hippocampal slices from the juvenile  
32 offspring prior to weaning (P17-P23). In this paradigm, the juvenile mice are only exposed to  
33 arsenic *in utero* and via the mother's milk.

34 Results: High (36ppm) and relatively low (50ppb) arsenic exposure both lead to decreased basal  
35 synaptic transmission in the hippocampus of juvenile mice. There was a mild decrease in paired-  
36 pulse facilitation in juvenile mice exposed to high, but not low, arsenic, suggesting the  
37 alterations in synaptic transmission are primarily post-synaptic. Finally, high developmental  
38 arsenic exposure led to a significant increase in long-term potentiation.

39 Discussion: These results suggest that indirect, ecologically-relevant arsenic exposure in early  
40 development impacts hippocampal synaptic transmission and plasticity that could underlie  
41 learning deficits reported in epidemiological studies.

42

43 **Keywords:** Arsenic; synaptic transmission; long-term potentiation; hippocampus; development

44

45

46 ***Introduction***

47 Early life exposure to toxic chemicals and environmental pollutants is associated with learning  
48 deficits and behavioral changes (Cory-Slechta et al., 2018; Liu et al., 2014; Santucci et al., 1994).

49 An estimated 200 million people worldwide are exposed to arsenic concentrations in drinking  
50 water that exceed the World Health Organization's recommended limit, 10 parts per billion (ppb)  
51 (Naujokas et al., 2013). Exposure to concerning levels of arsenic is not limited to toxic waste  
52 sites. Rather, arsenic levels commonly exceed 10ppb in domestic wells throughout the United  
53 States, especially in the southwest. While arsenic levels are kept below 10ppb in municipal water  
54 supplies, private wells are unregulated and arsenic levels exceed 10ppb in 20 out of 37 principal  
55 aquifers in the United States (DeSimone et al., 2015). Even mild increases in arsenic exposure  
56 are of concern, as exposure is associated with numerous adverse health outcomes and increased  
57 all-cause mortality (Naujokas et al., 2013).

58  
59 In January 2006, the maximum contaminant level (MCL) of arsenic in public water systems was  
60 lowered from 50ppb to 10ppb, in compliance with a previous United States Environmental  
61 Protection Agency (EPA) ruling (2001). This change was enacted due to several epidemiological  
62 studies demonstrating increased risk of cancer. While acute, high-level arsenic exposure was  
63 known to be associated with peripheral neuropathy, relatively little was known about the  
64 neurological consequences of chronic, low-level arsenic exposure (National Research Council  
65 (NRC) 1999). However, more recent epidemiological studies have demonstrated that arsenic  
66 exposure is associated with deficits in cognitive and motor functions in children and adults  
67 (Calderon et al., 2001; O'Bryant et al., 2011; Rosado et al., 2007; Tolins et al., 2014; Tsai et al.,  
68 2003; Tyler and Allan, 2014; Wang et al., 2020; Wasserman et al., 2004). Additionally, a recent

69 study suggests inequalities in arsenic exposure reductions following the 2006 change in the  
70 MCL, such that there was a higher concentration of arsenic in public water systems serving  
71 Hispanic and tribal communities, small rural communities, and Southwestern U.S. communities  
72 (Nigra et al., 2020). Given the relatively recent change in the arsenic MCL in public water in the  
73 U.S., the continued high exposure in many regions worldwide, and the known vulnerability of  
74 the developing brain to toxicants and pollutants underscores the critical need to understand the  
75 effects of early life exposure to arsenic.

76  
77 Electrophysiological studies in arsenic-exposed rodent models have begun to shed light on  
78 potential mechanistic underpinnings of the associated cognitive deficits. Rodents exposed to high  
79 arsenic concentrations throughout early development and adulthood demonstrate a decrease in  
80 synaptic transmission and long-term potentiation (LTP) (Nelson-Mora et al., 2018) in the  
81 hippocampus that may be secondary to altered glutamate transport (Siddoway, 2011). Similar  
82 changes in synaptic transmission and plasticity have been demonstrated by *ex vivo* exposure of  
83 hippocampal slices to arsenite metabolites (Kruger et al., 2006; Kruger et al., 2007). However,  
84 the electrophysiological effects of early developmental arsenic exposure have not been  
85 distinguished from chronic adulthood exposure. Because arsenic can cross the placenta and enter  
86 a mother's milk (Concha et al., 1998), we reasoned that gestational and post-parturition arsenic  
87 exposure could cause changes in synaptic transmission and plasticity even without adulthood  
88 exposure. Further, the effects of continued adulthood exposure on hippocampal synaptic function  
89 could differ from the effects of early developmental exposure alone. For example, whereas acute  
90 *ex vivo* exposure to arsenic metabolites attenuates LTP in hippocampal slices from adult rats, it  
91 facilitated LTP in young rats (Kruger et al., 2009). Here, we studied the effects of *in vivo* arsenic

92 exposure during gestation and early development by exposing dams to a high level of arsenic  
93 (36ppm) or a low level (50ppb), the MCL for public drinking water in the United States prior to  
94 2006. Of note, in this paradigm, the dam is exposed to arsenic directly via drinking water,  
95 whereas the offspring are exposed indirectly via placental transmission and the mother's milk.  
96 Surprisingly, we found that maternal exposure to even low levels of arsenic, i.e., 50ppb, impairs  
97 synaptic transmission in the hippocampus of offspring. Additionally, we observed different  
98 effects of arsenic exposure in our juvenile mice than what has been previously reported in adult  
99 mice (Table 1).

100

## 101 ***Materials and Methods***

### 102 Arsenic Exposure

103 All experimental protocols were approved by the Institutional Animal Care and Use Committee  
104 of the University of Rochester and carried out in compliance with ARRIVE guidelines. Given  
105 that arsenic(V) acid salt (arsenate) is the most common form of arsenic in groundwater (Cullen  
106 and Reimer, 1989), we utilized sodium arsenate dibasic heptahydrate ( $\text{Na}_2\text{HAsO}_4 \cdot 7\text{H}_2\text{O}$ ;  
107 hereon, arsenic), obtained from MilliporeSigma (A6756). C57BL/6 females were exposed to  
108 arsenic (0, 50ppb, 36ppm) in their drinking water (distilled deionized  $\text{H}_2\text{O}$ ) starting at six weeks  
109 of age. Breeding began at two months of age and arsenic exposure continued after parturition to  
110 simulate protracted human exposure conditions. The juvenile offspring were then used for  
111 experiments prior to weaning (P17-P23), such that the pups are still nursing-dependent. Both  
112 male and female pups were used for experiments. Mice were maintained with a 12:12 hour  
113 light:dark cycle, constant temperature of 23°C and *ad libitum* feeding. An overview of arsenic  
114 exposure is shown in Figure 1. In this paradigm, the juvenile mice are exposed to arsenic *in utero*

115 and via the mother's milk. Fresh arsenic solutions were prepared and exchanged every 2-3 days  
116 to avoid oxidation.

### 117 Electrophysiology

118 Acute hippocampal slices were prepared from male and female juvenile mice (P17-P23) prior to  
119 weaning. 400 $\mu$ m thick hippocampal slices were prepared after decapitation and rapid extraction  
120 of the brains into ice-cold artificial cerebrospinal fluid (ACSF). Slices were then allowed to  
121 recover in room temperature (RT) ACSF for at least one hour prior to experiments. Field  
122 recordings were conducted at Schaffer collateral-CA1 synapses in RT ACSF at a flow rate of 2-  
123 3mL/min. A borosilicate recording electrode (1-3M $\Omega$ ) filled with 1M NaCl was placed in CA1  
124 stratum radiatum and a monopolar stimulating electrode placed on Schaffer collaterals between  
125 CA3 and CA1. The ACSF solution consisted of, in mM: 120.0 NaCl; 2.5 KCl; 2.5 CaCl<sub>2</sub>; 1.3  
126 MgSO<sub>4</sub>; 1.0 NaH<sub>2</sub>PO<sub>4</sub>; 26.0 NaHCO<sub>3</sub>; and 11.0 D-glucose. ACSF was aerated with carbogen  
127 (95% O<sub>2</sub>, 5% CO<sub>2</sub>) throughout slice preparation, incubation, and recordings. Basal synaptic  
128 transmission was assessed by input-output (IO) curves, comparing the fiber volley, a more direct  
129 measure of axonal stimulation, to the field excitatory post-synaptic potential (fEPSP) slope. LTP  
130 was induced by a single tetanus of one second, 100Hz stimulation. Electrophysiology recordings  
131 were collected with a MultiClamp 700A amplifier (Axon Instruments), PCI-6221 data  
132 acquisition device (National Instruments), and Igor Pro 7 (Wavemetrics) with a customized  
133 software package (Recording Artist, <http://github.com/rgerkin/recording-artist>).

### 134 Analysis

135 Electrophysiology data was analyzed using R and GraphPad Prism. To generate IO curves, fiber  
136 volley amplitudes were binned at  $\pm 0.05$  mV, with the exception of 0.025 (0,0.025], 0.05  
137 (0.025,0.05], and 0.1 mV (0.075,1.5]. To measure the magnitude of LTP, we normalized the last

138 five minutes of fEPSPs (25-30 minutes after LTP induction) to the 10 minute baseline. Males  
139 and females were pooled for all analyses, with no sub-analysis of the effect of sex. Statistical  
140 significance between means was calculated using t-tests or two-way ANOVAs and Dunnett  
141 posthoc comparisons, with arsenic exposure and stimulation (fiber volley; inter-pulse interval) as  
142 factors.

143

#### 144 **Results**

145 Juvenile mice (P17-P23) exposed to either a low (50ppb) or high level (36ppm) of arsenic *in*  
146 *utero* and in early development exhibit a significant decrease in basal synaptic transmission in  
147 the hippocampus at the Schaffer collateral-CA1 synapse (Fig. 2A; two-way ANOVA, arsenic  
148 exposure:  $F(2,216)=22.31$ ,  $p<0.0001$ ; fiber volley:  $F(7,216)=99.87$ ,  $p<0.0001$ ). Interestingly, low  
149 and high arsenic exposure levels result in a similar decrease, such that high exposure does not  
150 reduce transmission beyond the deficit seen with low-level exposure. However, the two arsenic  
151 exposure levels differ in their effects on short-term pre-synaptic plasticity, as assessed by paired-  
152 pulse facilitation (PPF) (Fig. 2B). High arsenic exposure reduced PPF at short inter-pulse  
153 intervals (both 25ms and 15ms IPI, two-way ANOVA, arsenic exposure:  $F(2,242)=11.93$ ,  
154  $p<0.0001$ ; IPI:  $F(5,242)=49.22$ ,  $p<0.0001$ ; Dunnett's post-hoc,  $p<0.05$ ), whereas there is no  
155 significant change from control with low-level arsenic exposure. There was no significant  
156 difference between groups at longer inter-pulse intervals.

157

158 To assess long-term changes in synaptic plasticity, we gave high-frequency stimulation to induce  
159 LTP, a cellular model for neural circuit development as well as learning and memory.  
160 Surprisingly, high arsenic exposure levels increased LTP by about 11% (Fig. 3; 36ppm:



161 29%±0.03, n=13; control: 18%±0.04, n=7, p<0.05). Developmental exposure to low-level  
162 arsenic led to an 8% increase in LTP compared to control (50ppb: 26%±0.06, n=7), falling  
163 between the control and high arsenic exposure, but did not reach statistical significance.

164

### 165 ***Discussion***

166 Our findings show that early developmental arsenic exposure results in significant changes to  
167 hippocampal synaptic transmission and plasticity. The most interesting result from our study is  
168 that a relatively low dose of arsenic exposure decreases synaptic transmission. This is  
169 accompanied by no change in PPF, an indicator of glutamate release in presynaptic neurons; in  
170 our case, CA3 neurons. Therefore, our studies suggest that a low dose of arsenic led to a  
171 postsynaptic change in CA1 neurons contributing to the decrease in synaptic transmission. This  
172 is consistent with the decrease in neurite number and complexity observed in a cell culture model  
173 of arsenic exposure (Frankel et al., 2009). On the other hand, a high level of arsenic decreased  
174 PPF, suggesting that glutamate release is increased in presynaptic CA3 neurons. However, there  
175 is no overall synaptic transmission change between two doses of arsenic (50ppb and 36ppm).  
176 This is consistent with the notion that the higher concentration of arsenic caused a progression of  
177 changes to the hippocampal circuitry, such that there was a compensatory increase in glutamate  
178 release from presynaptic CA3 neurons in response to the changes in postsynaptic CA1 neurons  
179 for synaptic transmission.

180

181 Our data also indicate that both low and high levels of arsenic led to a trend of increased LTP  
182 expression, with an 8 and 11% increase respectively. Our studies build upon and extend previous  
183 studies that utilize acute *in vitro* exposure and chronic *in vivo* adulthood exposure. First, our

184 findings replicate the decrease in hippocampal basal synaptic transmission observed both in  
185 acute, high-concentration *in vitro* exposure of arsenite metabolites in young rat hippocampal  
186 slices (Kruger et al., 2006; Kruger et al., 2007; Kruger et al., 2009) as well as chronic, high-  
187 concentration (20ppm) *in vivo* exposure in adult mice (Nelson-Mora et al., 2018). Second, we  
188 found that the decrease in PPF previously observed with high-concentration arsenic exposure in  
189 adult mice (Nelson-Mora et al., 2018) was also observed in our high-concentration exposure in  
190 juvenile mice (Fig. 2B). Importantly, in our model, changes in basal synaptic transmission were  
191 observed even with low-concentration (50ppb) gestational and early developmental exposure.  
192 Third, our findings reveal differences between juvenile and adult mice exposed to arsenic.  
193 Whereas a previous study found a decrease in the degree of LTP in mice exposed to high-  
194 concentration arsenic from gestation through adulthood (Nelson-Mora et al., 2018), we observed  
195 an *increase* in LTP in our juvenile mice. Together, these findings suggest a progression of  
196 changes induced by arsenic exposure, where LTP is facilitated in juvenile mice but attenuated  
197 with prolonged exposure, consistent with differential effects depending upon the timing of  
198 exposure, i.e., the critical window of exposure.  
199  
200 Most strikingly, the pups in our experiments had little direct exposure to arsenic, rather they  
201 were exposed *in utero* and via the mother's milk, as nursing typically continues into the third  
202 week of life. Previous research suggests that the transmission of arsenic through the placenta is  
203 higher than transmission into breast milk (Carignan et al., 2015; Concha et al., 1998). Therefore,  
204 it is possible that our results are primarily due to the gestational, rather than developmental,  
205 exposure in our paradigm. The 50ppb findings are of particular interest for several reasons: 1)  
206 50ppb was the effective arsenic MCL in the United States for decades prior to 2006; 2) the

207 permissible level of arsenic continues to be above 10ppb in many countries; and 3) mean arsenic  
208 levels exceed 10ppb in many common beverages and 50ppb in many common foods (Wilson,  
209 2015). The current results suggest that indirect, ecologically-relevant arsenic exposure in early  
210 development impacts hippocampal synaptic transmission.

211 **Acknowledgments:** This study was funded by a Pilot Grant from the University of Rochester  
212 Environmental Health Sciences Center (P30 ES00247). Figure 1 was created in part using  
213 Servier Medical Art images (<https://smart.servier.com>), licensed under a Creative Commons  
214 Attribution 3.0 Unported License.  
215

## 216 **References**

- 217 (NRC), N.R.C., 1999. Arsenic in drinking water. National Academies Press.
- 218 Calderon, J., Navarro, M.E., Jimenez-Capdeville, M.E., Santos-Diaz, M.A., Golden, A.,  
219 Rodriguez-Leyva, I., Borja-Aburto, V., Diaz-Barriga, F., 2001. Exposure to arsenic and lead and  
220 neuropsychological development in Mexican children. *Environ Res* 85(2), 69-76.
- 221 Carignan, C.C., Cottingham, K.L., Jackson, B.P., Farzan, S.F., Gandolfi, A.J., Punshon, T., Folt,  
222 C.L., Karagas, M.R., 2015. Estimated exposure to arsenic in breastfed and formula-fed infants in  
223 a United States cohort. *Environ Health Perspect* 123(5), 500-506.
- 224 Concha, G., Vogler, G., Lezcano, D., Nermell, B., Vahter, M., 1998. Exposure to Inorganic  
225 Arsenic Metabolites during Early Human Development. *Toxicological Sciences* 44(2), 185-190.
- 226 Cory-Slechta, D.A., Allen, J.L., Conrad, K., Marvin, E., Sobolewski, M., 2018. Developmental  
227 exposure to low level ambient ultrafine particle air pollution and cognitive dysfunction.  
228 *Neurotoxicology* 69, 217-231.
- 229 Cullen, W.R., Reimer, K.J., 1989. Arsenic speciation in the environment. *Chemical Reviews*  
230 89(4), 713-764.
- 231 DeSimone, L.A., McMahon, P.B., Rosen, M.R., 2015. The quality of our Nation's waters: water  
232 quality in Principal Aquifers of the United States, 1991-2010. US Geological Survey.
- 233 EPA, U., 2001. National primary drinking water regulations: arsenic and clarifications to  
234 compliance and new source contaminants monitoring. *Federal Register* 66(14), 69-76.
- 235 Frankel, S., Concannon, J., Brusky, K., Pietrowicz, E., Giorgianni, S., Thompson, W.D., Currie,  
236 D.A., 2009. Arsenic exposure disrupts neurite growth and complexity in vitro. *Neurotoxicology*  
237 30(4), 529-537.
- 238 Kruger, K., Binding, N., Straub, H., Musshoff, U., 2006. Effects of arsenite on long-term  
239 potentiation in hippocampal slices from young and adult rats. *Toxicol Lett* 165(2), 167-173.
- 240 Kruger, K., Repges, H., Hippler, J., Hartmann, L.M., Hirner, A.V., Straub, H., Binding, N.,  
241 Musshoff, U., 2007. Effects of dimethylarsinic and dimethylarsinous acid on evoked synaptic  
242 potentials in hippocampal slices of young and adult rats. *Toxicol Appl Pharmacol* 225(1), 40-46.
- 243 Kruger, K., Straub, H., Hirner, A.V., Hippler, J., Binding, N., Musshoff, U., 2009. Effects of  
244 monomethylarsonic and monomethylarsonous acid on evoked synaptic potentials in hippocampal  
245 slices of adult and young rats. *Toxicol Appl Pharmacol* 236(1), 115-123.
- 246 Liu, J., Liu, X., Wang, W., McCauley, L., Pinto-Martin, J., Wang, Y., Li, L., Yan, C., Rogan,  
247 W.J., 2014. Blood lead concentrations and children's behavioral and emotional problems: a  
248 cohort study. *JAMA Pediatr* 168(8), 737-745.
- 249 Naujokas, M.F., Anderson, B., Ahsan, H., Aposhian, H.V., Graziano, J.H., Thompson, C., Suk,  
250 W.A., 2013. The broad scope of health effects from chronic arsenic exposure: update on a  
251 worldwide public health problem. *Environ Health Perspect* 121(3), 295-302.
- 252 Nelson-Mora, J., Escobar, M.L., Rodriguez-Duran, L., Massieu, L., Montiel, T., Rodriguez,  
253 V.M., Hernandez-Mercado, K., Gonsebatt, M.E., 2018. Gestational exposure to inorganic arsenic  
254 (iAs3+) alters glutamate disposition in the mouse hippocampus and ionotropic glutamate  
255 receptor expression leading to memory impairment. *Arch Toxicol* 92(3), 1037-1048.
- 256 Nigra, A.E., Chen, Q., Chillrud, S.N., Wang, L., Harvey, D., Mailloux, B., Factor-Litvak, P.,  
257 Navas-Acien, A., 2020. Inequalities in Public Water Arsenic Concentrations in Counties and  
258 Community Water Systems across the United States, 2006-2011. *Environ Health Perspect*  
259 128(12), 127001.

260 O'Bryant, S.E., Edwards, M., Menon, C.V., Gong, G., Barber, R., 2011. Long-term low-level  
261 arsenic exposure is associated with poorer neuropsychological functioning: a Project FRONTIER  
262 study. *Int J Environ Res Public Health* 8(3), 861-874.  
263 Rosado, J.L., Ronquillo, D., Kordas, K., Rojas, O., Alatorre, J., Lopez, P., Garcia-Vargas, G.,  
264 Del Carmen Caamano, M., Cebrian, M.E., Stoltzfus, R.J., 2007. Arsenic exposure and cognitive  
265 performance in Mexican schoolchildren. *Environ Health Perspect* 115(9), 1371-1375.  
266 Santucci, D., Rankin, J., Laviola, G., Aloe, L., Alleva, E., 1994. Early exposure to aluminium  
267 affects eight-arm maze performance and hippocampal nerve growth factor levels in adult mice.  
268 *Neurosci Lett* 166(1), 89-92.  
269 Siddoway, B.H., H. Xia, H., 2011. *Glutamatergic Synapses: Molecular Organisation*. eLS  
270 <https://doi.org/10.1002/9780470015902.a0000235.pub2>.  
271 Tolins, M., Ruchirawat, M., Landrigan, P., 2014. The developmental neurotoxicity of arsenic:  
272 cognitive and behavioral consequences of early life exposure. *Ann Glob Health* 80(4), 303-314.  
273 Tsai, S.-Y., Chou, H.-Y., The, H.-W., Chen, C.-M., Chen, C.-J., 2003. The Effects of Chronic  
274 Arsenic Exposure from Drinking Water on the Neurobehavioral Development in Adolescence.  
275 *NeuroToxicology* 24(4-5), 747-753.  
276 Tyler, C.R., Allan, A.M., 2014. The Effects of Arsenic Exposure on Neurological and Cognitive  
277 Dysfunction in Human and Rodent Studies: A Review. *Curr Environ Health Rep* 1, 132-147.  
278 Wang, X., Huang, X., Zhou, L., Chen, J., Zhang, X., Xu, K., Huang, Z., He, M., Shen, M., Chen,  
279 X., Tang, B., Shen, L., Zhou, Y., 2020. Association of arsenic exposure and cognitive  
280 impairment: A population-based cross-sectional study in China. *Neurotoxicology* 82, 100-107.  
281 Wasserman, G.A., Liu, X., Parvez, F., Ahsan, H., Factor-Litvak, P., van Geen, A., Slavkovich,  
282 V., LoIacono, N.J., Cheng, Z., Hussain, I., Momotaj, H., Graziano, J.H., 2004. Water arsenic  
283 exposure and children's intellectual function in Araihaazar, Bangladesh. *Environ Health Perspect*  
284 112(13), 1329-1333.  
285 Wilson, D., 2015. Arsenic Consumption in the United States. *J Environ Health* 78(3), 8-14; quiz  
286 44.  
287  
288

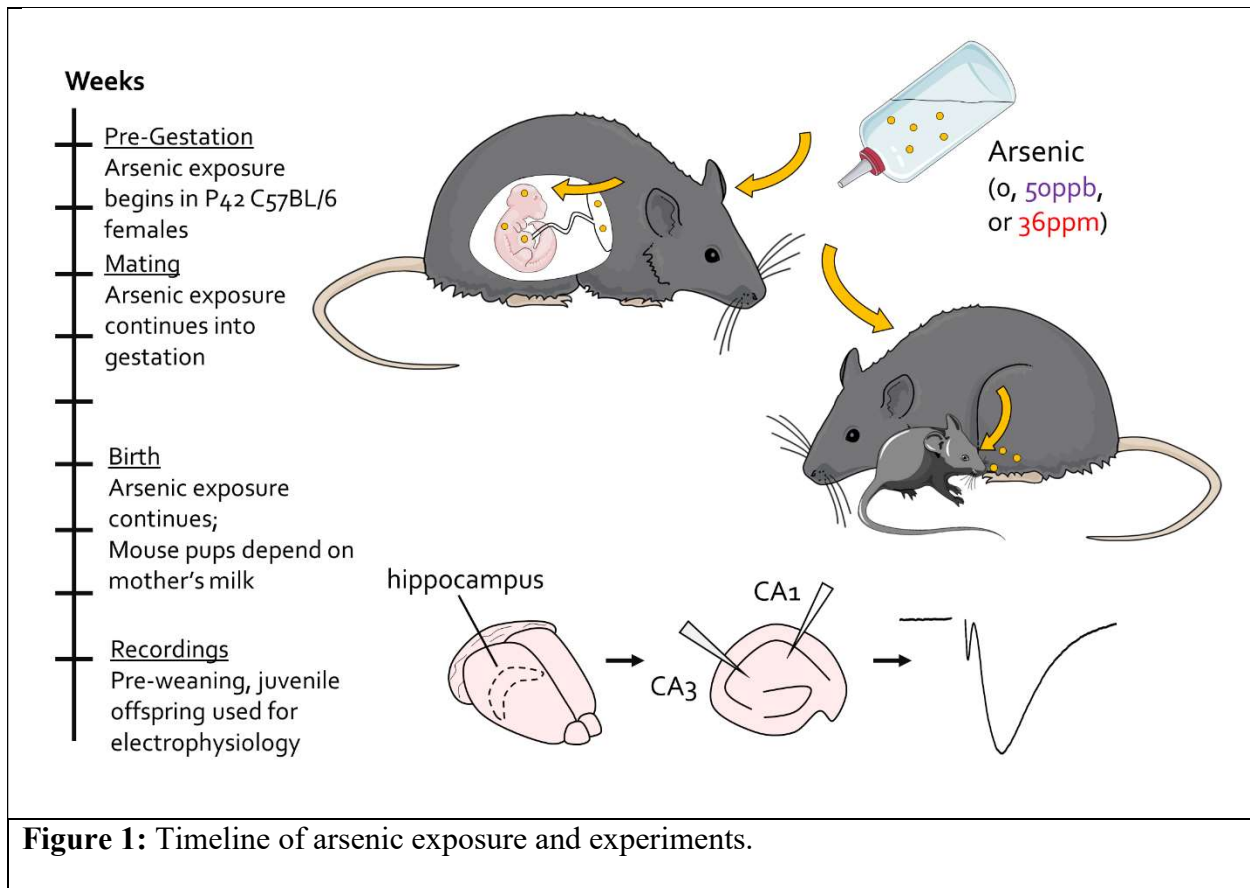

**Figure 1:** Timeline of arsenic exposure and experiments.

289

290

291

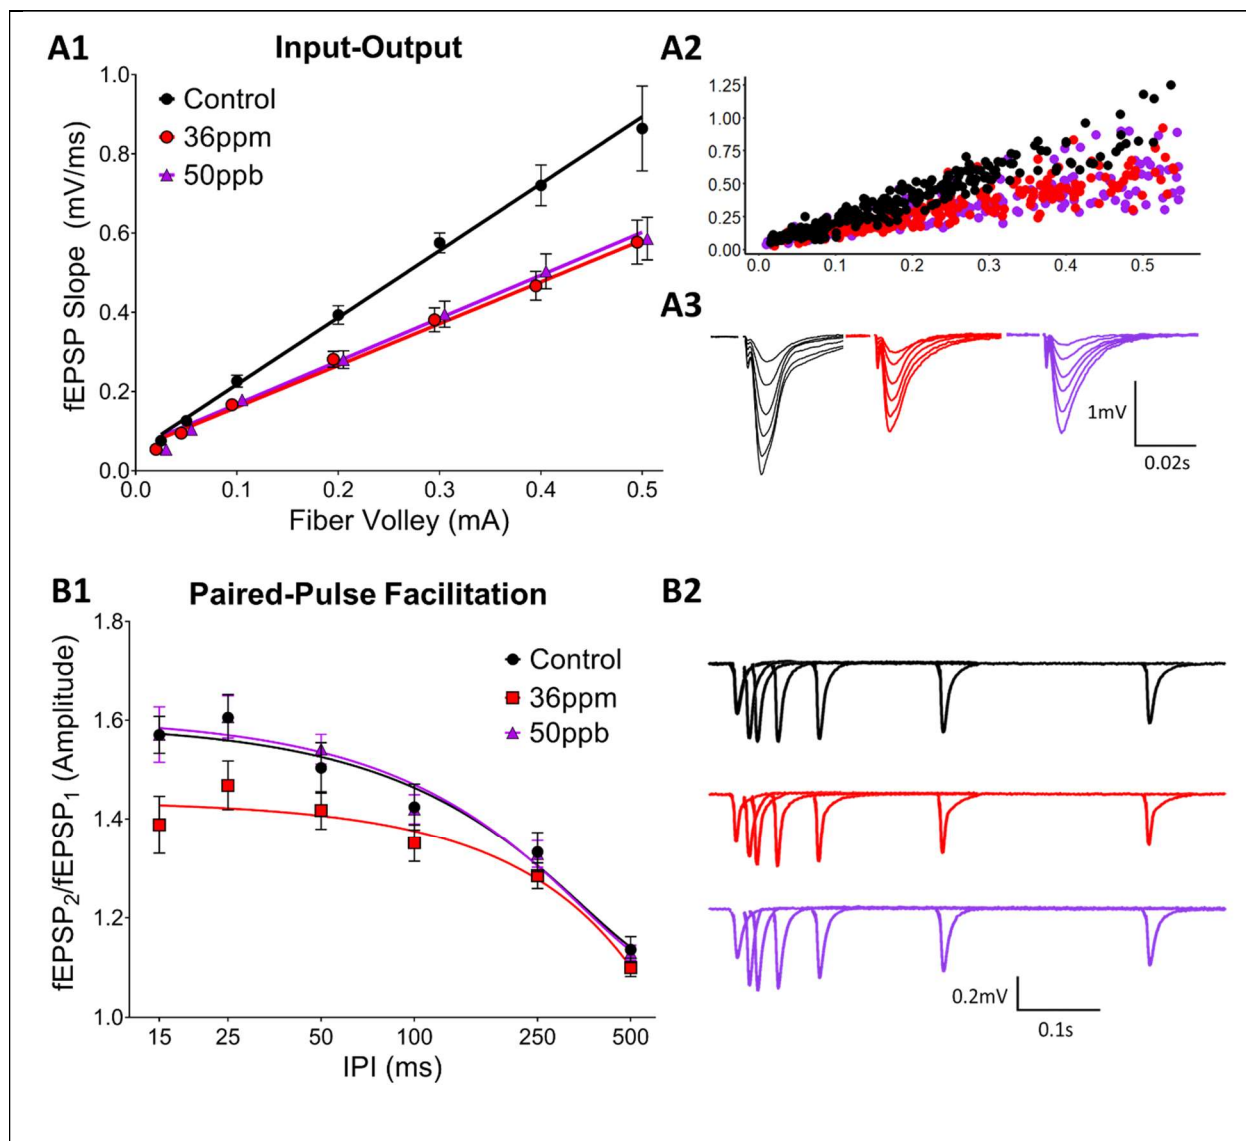

**Figure 2:** Effect of arsenic on hippocampal basal synaptic transmission (A) and short-term presynaptic plasticity (B), as assessed by input-output curves and paired-pulse facilitation, respectively. The averaged responses from all experiments are shown in A1 and B1 and waveforms from individual experiments in A3 and B2. Pre-binned, individual values from all input-output experiments are shown in A2.

292



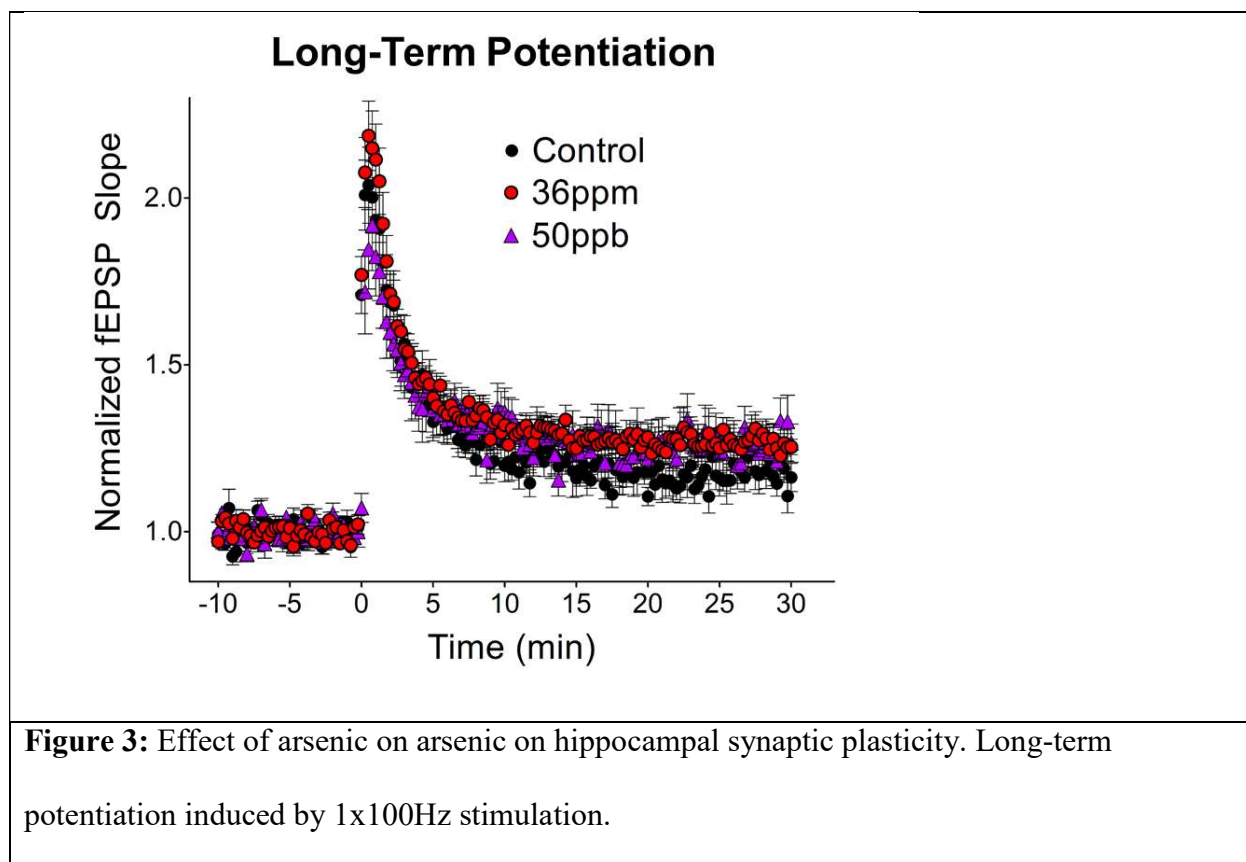

293
